# Supplementary material for: Synergetic effect of functionalized carbon nanotubes on ZnCr–mixed metal oxides for enhanced solar light-driven photocatalytic performance
Source: Royal Society of Chemistry journal article supplement (doi:10.1039/c6ra05291f), 2016-01-01
Supplement: c6ra05291f1.pdf [file c6ra05291f1.pdf]

## Supporting Information

### **Synergetic effect of functionalized carbon nanotubes on ZnCr- mixed metal oxides for enhanced solar light-driven photocatalytic performance**

Yajie Zhu <sup>a, b</sup>, Pingxiao Wu <sup>a, b, c, \*</sup>, Shanshan Yang <sup>a, b</sup>, Yonghong Lu <sup>a, b</sup>, Wen Li <sup>a, b</sup>, Nengwu Zhu <sup>a, c</sup>,  
Zhi Dang <sup>a, b</sup>, Ziyang Huang <sup>a, b</sup>

<sup>a</sup> *College of Environment and Energy, South China University of Technology, Guangzhou 510006,  
China*

<sup>b</sup> *The Key Lab of Pollution Control and Ecosystem Restoration in Industry Clusters, Ministry of  
Education, Guangzhou 510006, China*

<sup>c</sup> *Guangdong Environmental Protection Key Laboratory of Solid Waste Treatment and Recycling,  
Guangzhou 510006, China*

\*Corresponding Author

Phone: +86-20-39380538;

Fax: +86-20-39383725;

E-mail address: [pppxwu@scut.edu.cn](mailto:pppxwu@scut.edu.cn)

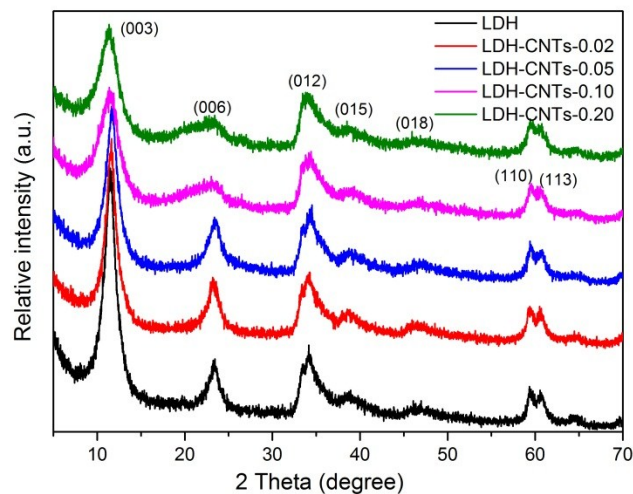

Fig. S1 XRD patterns of LDH-CNTs-x (x = 0, 0.02, 0.05, 0.10, 0.20)

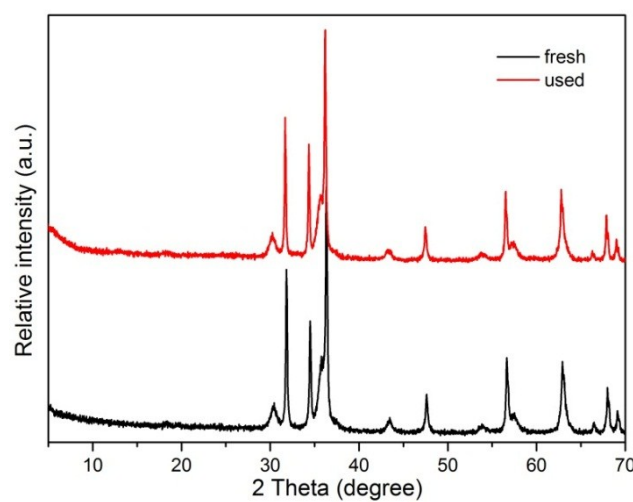

Fig. S2 XRD patterns of MMO-CNTs-0.10 before and after use
